# Supplementary material
Source: HighWire-hosted journal article supplement (http://thorax.bmj.com/highwire/filestream/174690/field_highwire_adjunct_files/0/thorax_54_1.pdf)
Supplement: thorax_54_1.pdf [file thorax_54_1.pdf]

BTS guidelines on the diagnosis, assessment and treatment of diffuse parenchymal lung disease in adults. *Thorax* 1999 Apr; 54(Suppl 1): 1-28.

This has been superseded By 2008 Guideline And 2013 NICE IPF Guideline CG163, available at *Thorax* 2008 Sep; 63(Suppl 5) and <http://www.nice.org.uk/guidance/index.jsp?action=byID&o=14183>.
